# Supplementary material
Source: MDPI journal article supplement (https://www.mdpi.com/2073-4344/13/6/963)
Supplement: s1 [file s1]

## Supplementary Materials

# Synergy between Sulfonic Functions and Ru Nanoparticles Supported on Activated Carbon for the Valorization of Cellulose into Sorbitol

Samuel Carlier <sup>1</sup>, Walid Baaziz <sup>2</sup>, Ovidiu Ersen <sup>2</sup> and Sophie Hermans <sup>1,\*</sup>

<sup>1</sup> IMCN Institute, Université catholique de Louvain, Place L. Pasteur 1, 1348 Louvain-la-Neuve, Belgium

<sup>2</sup> Institut de Physique et de Chimie des Matériaux de Strasbourg, CNRS-UMR7504, 23 rue du Loess, CEDEX 2 BP 43, 67034 Strasbourg, France

\* Correspondence: sophie.hermans@uclouvain.be

## Content

S1. S<sub>2p</sub> peaks from XPS analyses for the SO<sub>3</sub>H / AC catalyst without heat-treatment and with heat-treatment at 200 °C, 300 °C and 400 °C

S2. Kinetic curves for bifunctional catalysts prepared with different SO<sub>3</sub>H heat-treatments

S3. S<sub>2p</sub> peaks and atomic ratio from XPS analyses for the pre-treated SO<sub>3</sub>H / AC catalyst

S4. Conversion of cellobiose, selectivity and yield in sorbitol corresponding to the kinetic curves in main text in Figure 1

S5. List of molecules injected in HPLC

S6. C<sub>1s</sub> and Ru<sub>3d</sub> peaks from XPS analyses for different AC supported catalysts

S7. Atomic percentage of C<sub>1s</sub> and Ru<sub>3d</sub> from XPS analyses of monofunctional and bifunctional catalysts with 3 wt.% of Ru

S8. HR-TEM, STEM and EDX mapping analyses for monofunctional and bifunctional catalysts, before and after catalytic reaction

S9. Comparison of Ru regions from XPS analyses before and after several catalytic runs

S1.  $S_{2p}$  peaks from XPS analyses for the  $SO_3H$  / AC catalyst without heat-treatment and with heat-treatment at 200 °C, 300 °C and 400 °C

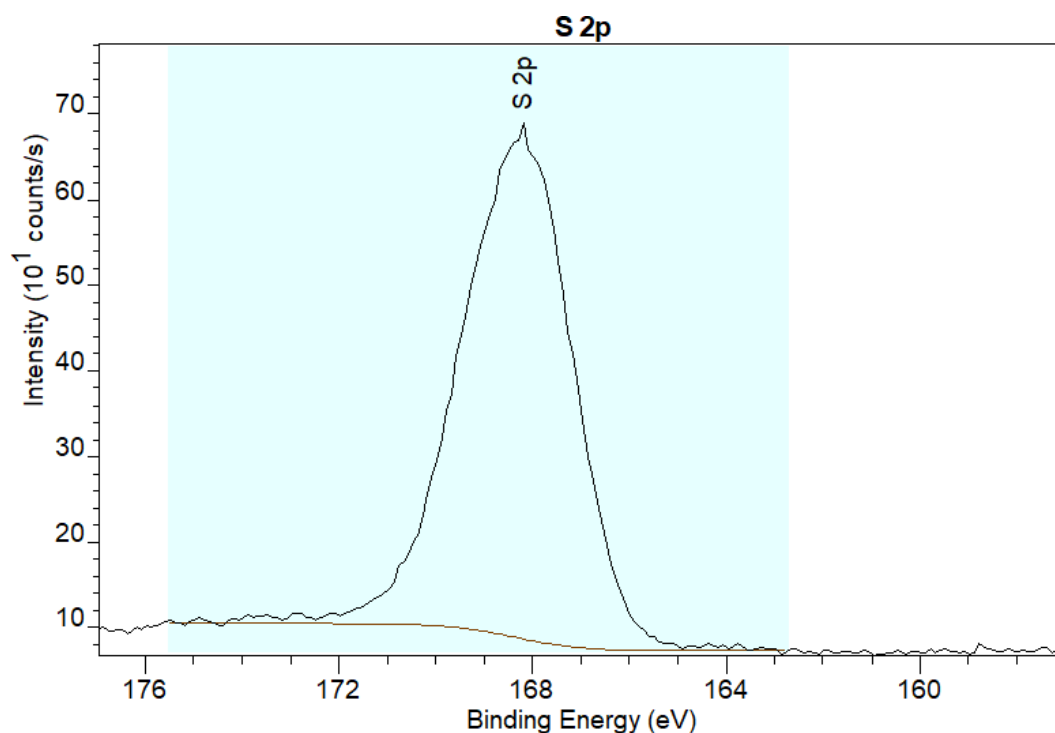

Figure 1:  $S_{2p}$  peak from XPS analysis for  $SO_3H$  / AC catalyst without heat-treatment

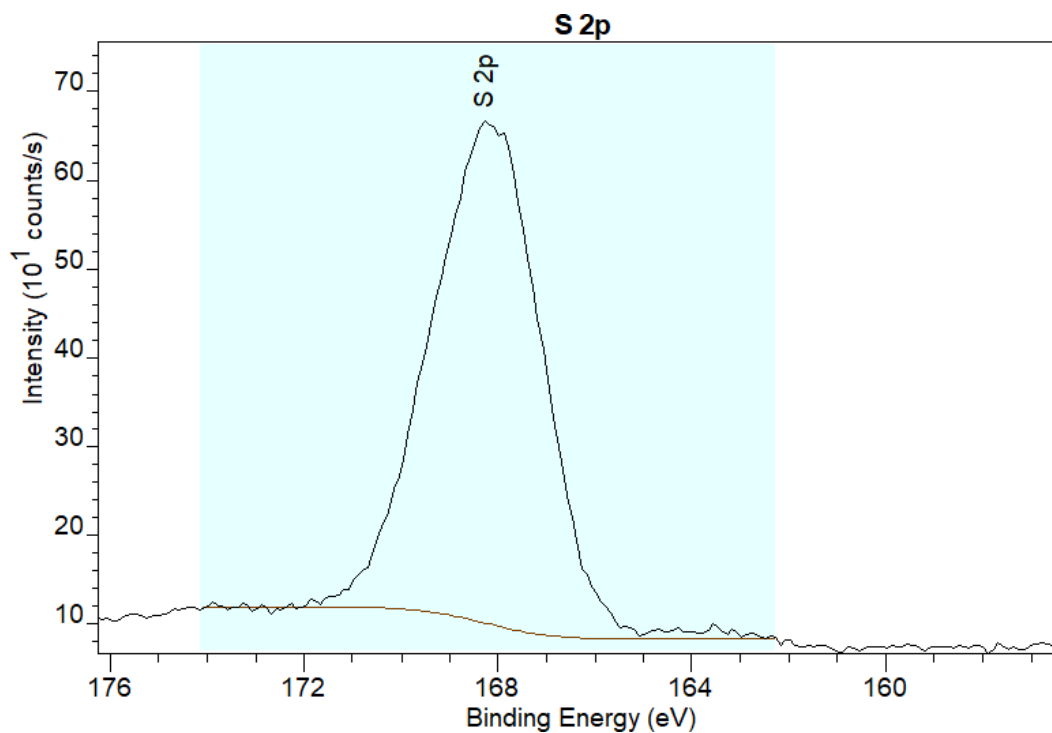

Figure 2:  $S_{2p}$  peak from XPS analysis for  $SO_3H$  / AC catalyst heat-treated at 200 °C

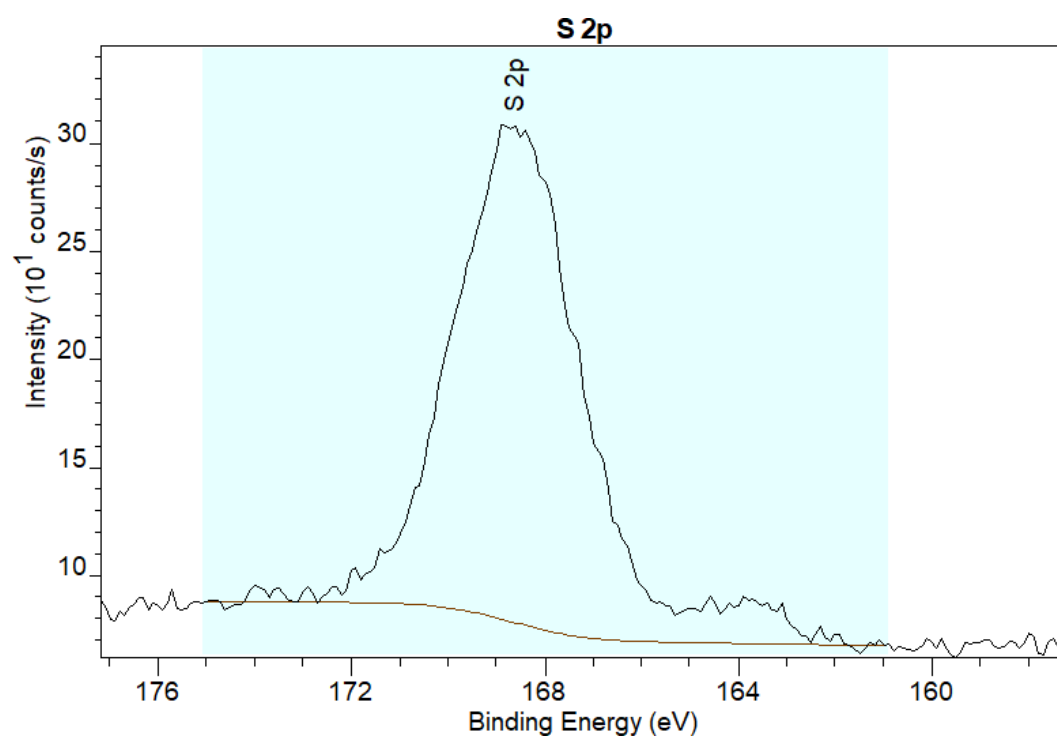

Figure 3:  $S_{2p}$  peak from XPS analysis for  $SO_3H$  / AC catalyst heat-treated at 300 °C

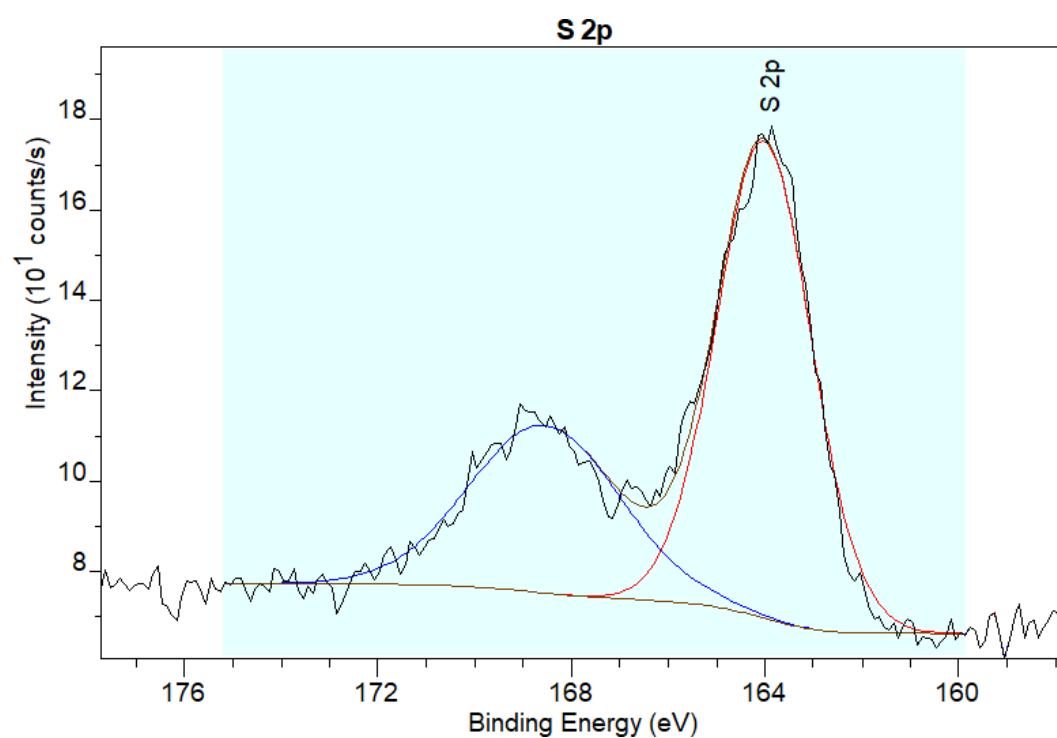

Figure 4:  $S_{2p}$  peak from XPS analysis for  $SO_3H$  / AC catalyst heat-treated at 400 °C

## S2. Kinetic curves for bifunctional catalysts prepared with different SO<sub>3</sub>H heat-treatments

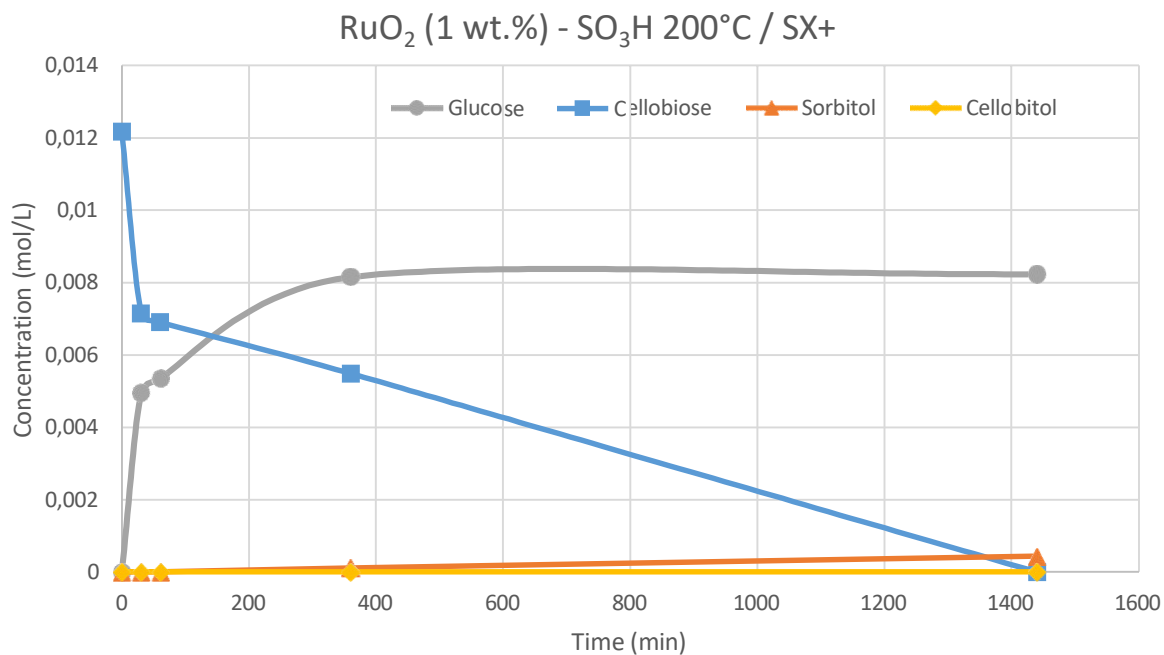

Figure 5: Kinetic curves for the transformation of cellobiose into sorbitol with RuO<sub>2</sub> (1 wt.%) – SO<sub>3</sub>H treated at 200°C / SX+ catalyst; the lines connecting experimental points are only a visual aid and do not correspond to any mathematical model

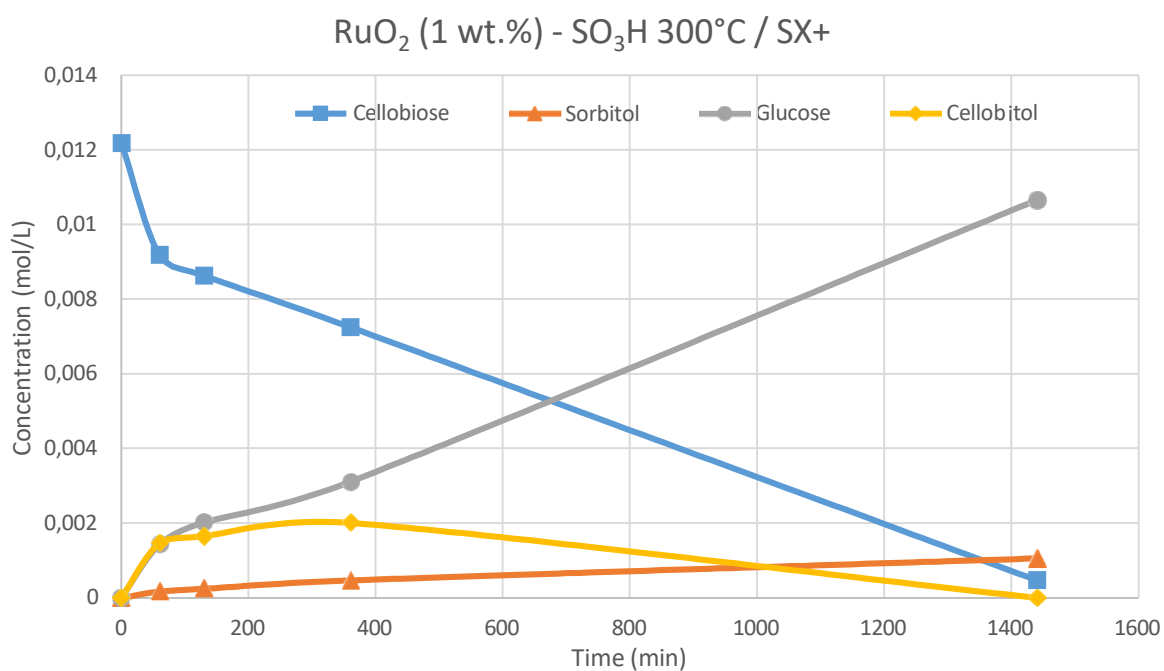

Figure 6: Kinetic curves for the transformation of cellobiose into sorbitol with RuO<sub>2</sub> (1 wt.%) – SO<sub>3</sub>H treated at 300°C / SX+ catalyst; the lines connecting experimental points are only a visual aid and do not correspond to any mathematical model

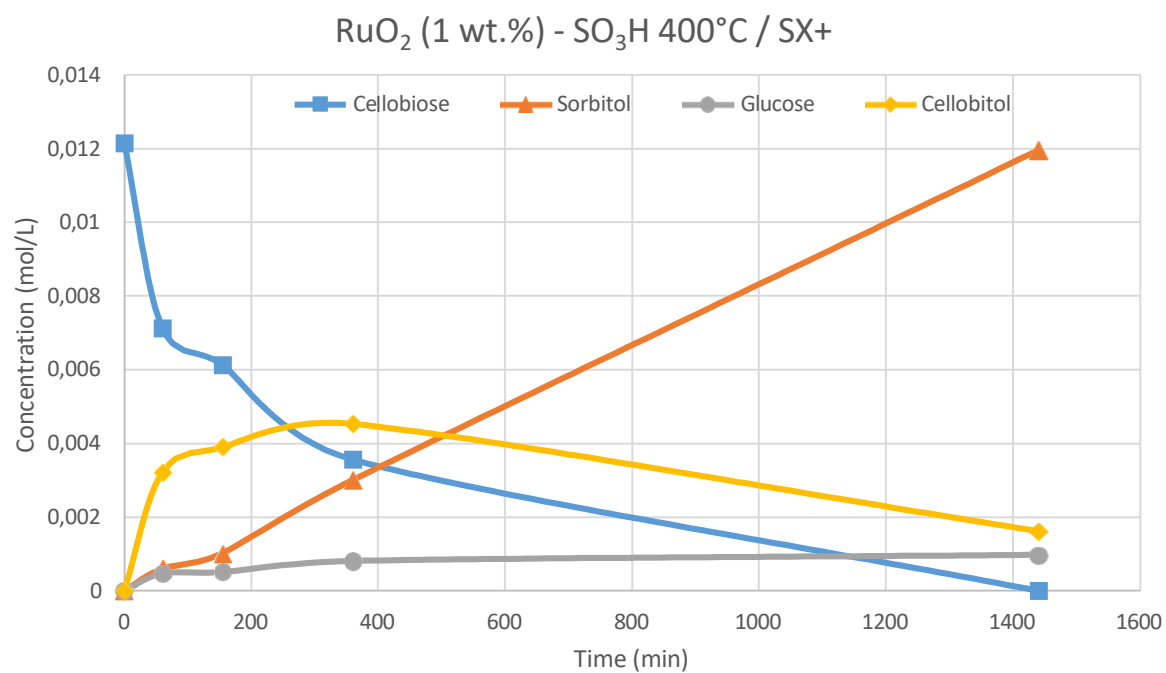

*Figure 7: Kinetic curves for the transformation of cellobiose into sorbitol RuO<sub>2</sub> (1 wt.%) – SO<sub>3</sub>H treated at 400°C / SX+ catalyst; the lines connecting experimental points are only a visual aid and do not correspond to any mathematical model*

### S3. $S_{2p}$ peaks and atomic percentages from XPS analyses for the pre-treated $SO_3H$ / AC catalyst

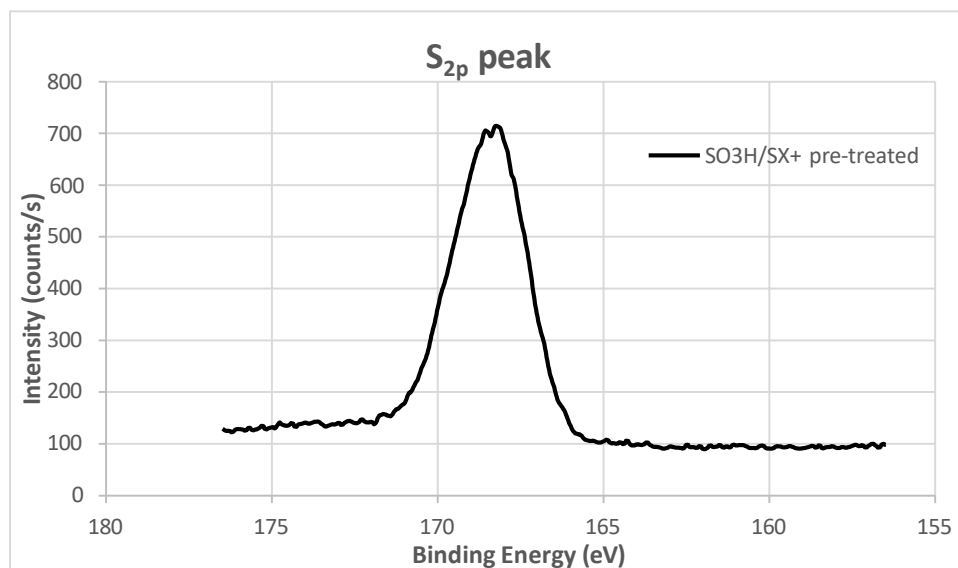

Figure 8:  $S_{2p}$  peak from XPS analyses of pre-treated  $SO_3H$  /  $SX^+$

Table 1: Oxygen and sulfur contents determined by XPS of the acidic catalysts without pre-treatment and with pre-treatment in the same condition as catalytic tests

| Catalyst                 | O (at. %) | S (at. %) |
|--------------------------|-----------|-----------|
| $SO_3H$ / AC             | 12.95     | 3.66      |
| Pre-treated $SO_3H$ / AC | 13.64     | 3.10      |

**S4. Conversion of cellobiose, selectivity and yield in sorbitol corresponding to the kinetic curves in main text in Figure 1**

*Table 2: Results of the kinetic study for the hydrogenolysis of cellobiose with RuO<sub>2</sub> (5 wt.%) / AC; Cellobiose conversion, selectivity in glucose, cellobitol and sorbitol, yield in sorbitol (150°C, 30 bar of H<sub>2</sub>, 24h, 150 mg of catalyst)*

| <b>Time (min)</b> | <b>Cellobiose conversion (%)</b> | <b>Glucose selectivity (%)</b> | <b>Cellobitol selectivity (%)</b> | <b>Sorbitol selectivity (%)</b> | <b>Sorbitol yield (%)</b> |
|-------------------|----------------------------------|--------------------------------|-----------------------------------|---------------------------------|---------------------------|
| 60                | 100                              | 2                              | 58                                | 16                              | 16                        |
| 130               | 100                              | 3                              | 48                                | 22                              | 22                        |
| 360               | 100                              | 3                              | 31                                | 28                              | 28                        |
| 1440              | 100                              | 0                              | 0                                 | 28                              | 28                        |

*Table 3: Results of the kinetic study for the hydrogenolysis of cellobiose with RuO<sub>2</sub> (5 wt.%) – pre-treated SO<sub>3</sub>H / AC; Cellobiose conversion, selectivity in glucose, cellobitol and sorbitol, yield in sorbitol (150°C, 30 bar of H<sub>2</sub>, 24h, 150 mg of catalyst)*

| <b>Time (min)</b> | <b>Cellobiose conversion (%)</b> | <b>Glucose selectivity (%)</b> | <b>Cellobitol selectivity (%)</b> | <b>Sorbitol selectivity (%)</b> | <b>Sorbitol yield (%)</b> |
|-------------------|----------------------------------|--------------------------------|-----------------------------------|---------------------------------|---------------------------|
| 60                | 84                               | 6                              | 50                                | 26                              | 22                        |
| 120               | 88                               | 6                              | 48                                | 31                              | 27                        |
| 360               | 91                               | 6                              | 47                                | 39                              | 35                        |
| 1440              | 100                              | 0                              | 5                                 | 68                              | 68                        |

## S5. List of molecules injected in HPLC

Table 4: List of molecules analyzed by HPLC and observation of their presence or not in catalytic tests

| Molecule   | Supplier and purity           | Observed in catalytic tests |
|------------|-------------------------------|-----------------------------|
| Arabinose  | Sigma-Aldrich - $\geq 99$ %   | X                           |
| Dulcitol   | Sigma-Aldrich - $\geq 99$ %   | X                           |
| Erythritol | Sigma-Aldrich - $\geq 99$ %   | X                           |
| Fructose   | Sigma-Aldrich - $\geq 99$ %   | ✓                           |
| Galactose  | Sigma-Aldrich - $\geq 99$ %   | X                           |
| HMF        | Sigma-Aldrich - 99 %          | X                           |
| Lactitol   | Sigma-Aldrich - 98 %          | X                           |
| Maltose    | Sigma-Aldrich - 99 %          | X                           |
| Mannose    | Sigma-Aldrich - $\geq 99$ %   | X                           |
| Mannitol   | Sigma-Aldrich - $\geq 98$ %   | ✓                           |
| Sucrose    | Sigma-Aldrich - $\geq 99.5$ % | X                           |
| Xylitol    | Sigma-Aldrich - $\geq 99$ %   | ✓                           |



## S6. $C_{1s}$ and $Ru_{3d}$ peaks from XPS analyses for different AC supported catalysts

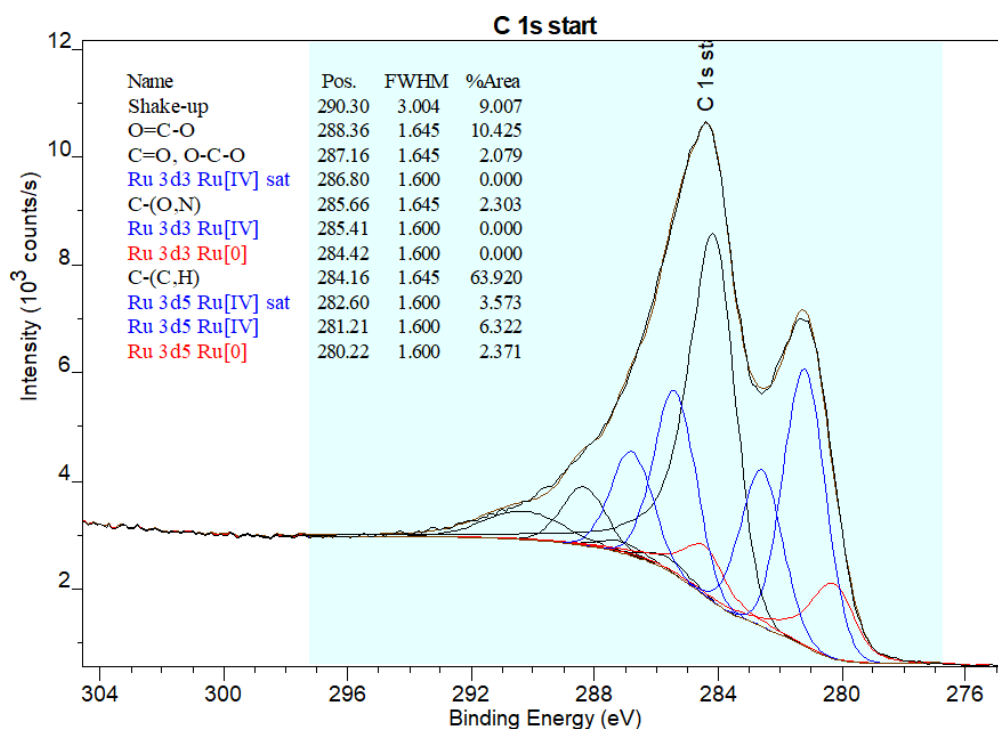

Figure 9:  $C_{1s}$  and  $Ru_{3d}$  peaks from XPS analyses of  $RuO_2$  (5 wt. %) / AC catalyst

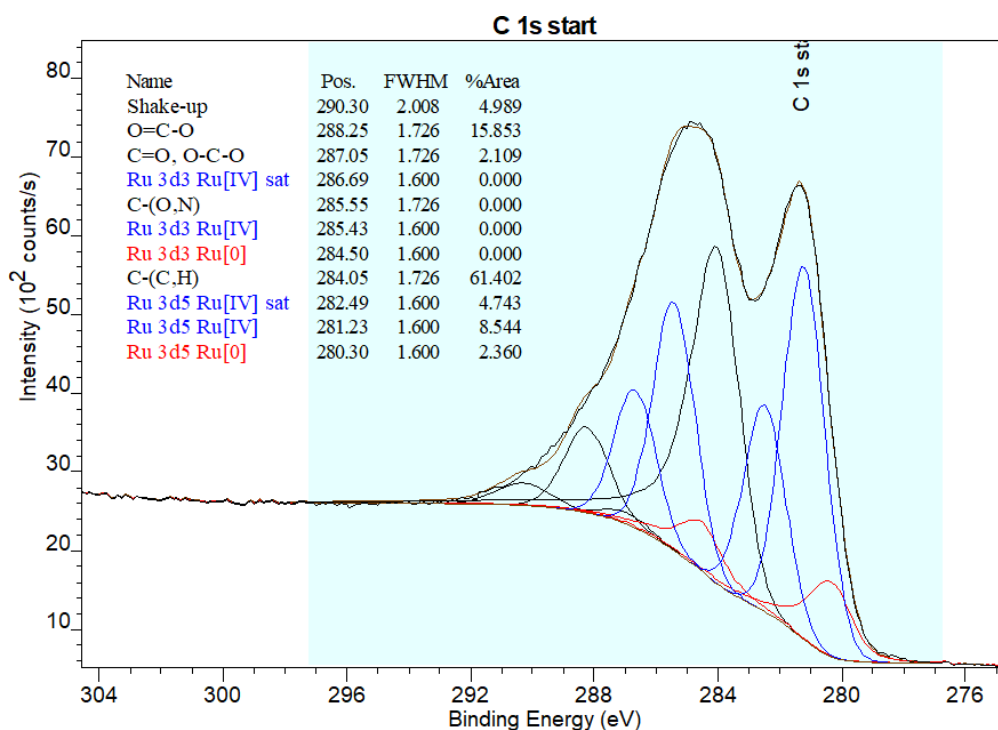

Figure 10:  $C_{1s}$  and  $Ru_{3d}$  peaks from XPS analyses of  $RuO_2$  (5 wt. %) – pre-treated  $SO_3H$  / AC catalyst

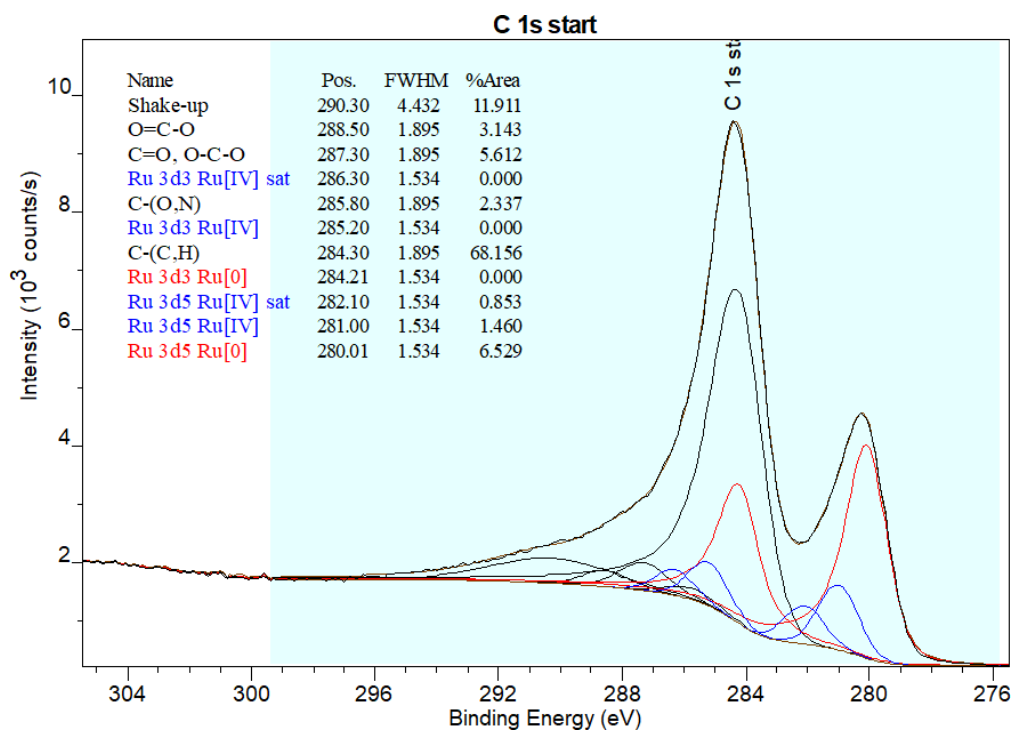

Figure 11:  $C_{1s}$  and  $Ru_{3d}$  peaks from XPS analyses of  $RuO_2$  (5 wt. %) / AC catalyst after 5 runs

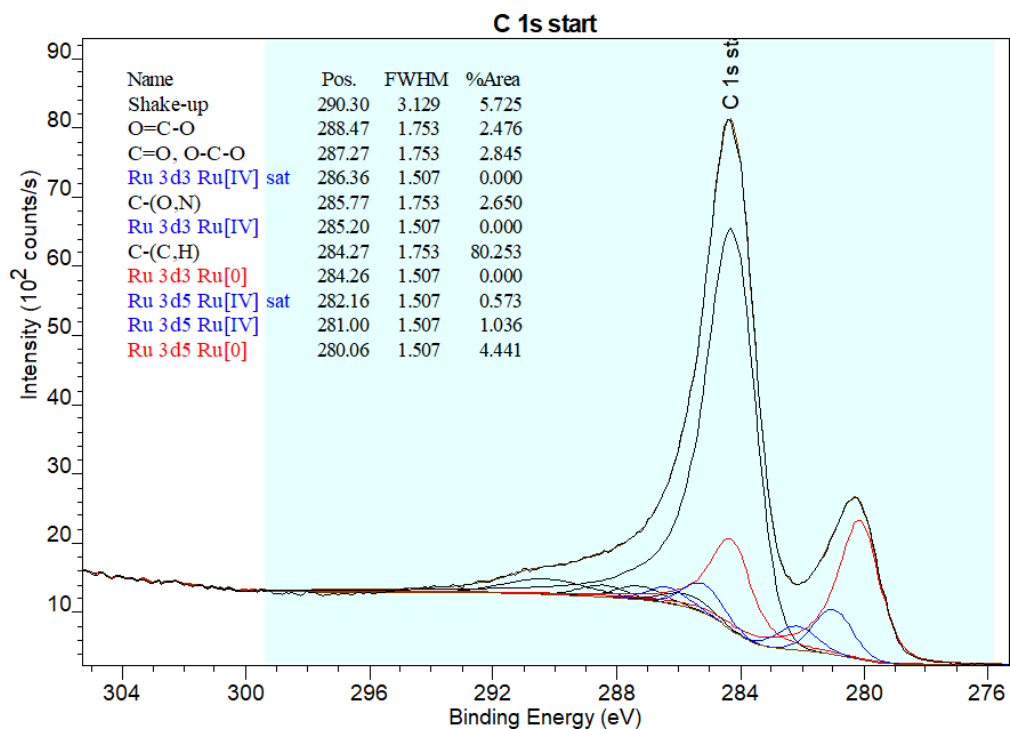

Figure 12:  $C_{1s}$  and  $Ru_{3d}$  peaks from XPS analyses of  $RuO_2$  (5 wt. %) – pre-treated  $SO_3H$  / AC catalyst after 5 runs

*S7. Atomic percentage of C<sub>1s</sub> and Ru<sub>3d</sub> from XPS analyses of monofunctional and bifunctional catalysts with 3 wt.% of Ru*

*Table 5: Atomic ratio of C<sub>1s</sub> and Ru<sub>3d</sub> for RuO<sub>2</sub> (3 wt.%) / AC and RuO<sub>2</sub> (3 wt.%) – pre-treated SO<sub>3</sub>H / AC*

| <b>Catalyst</b>                                                    | <b>C<sub>1s</sub> (at. %)</b> | <b>Ru<sub>3d</sub> (IV) (at. %)</b> | <b>Ru<sub>3d</sub> (0) (at. %)</b> |
|--------------------------------------------------------------------|-------------------------------|-------------------------------------|------------------------------------|
| <i>RuO<sub>2</sub> (3%) / AC</i>                                   | 73.4                          | 4.4                                 | 0.4                                |
| <i>RuO<sub>2</sub> (3%) – pre-treated<br/>SO<sub>3</sub>H / AC</i> | 59.4                          | 5.9                                 | 0.6                                |

*S8. HR-TEM, STEM and EDX mapping analyses for monofunctional and bifunctional catalysts, before and after catalytic reaction*

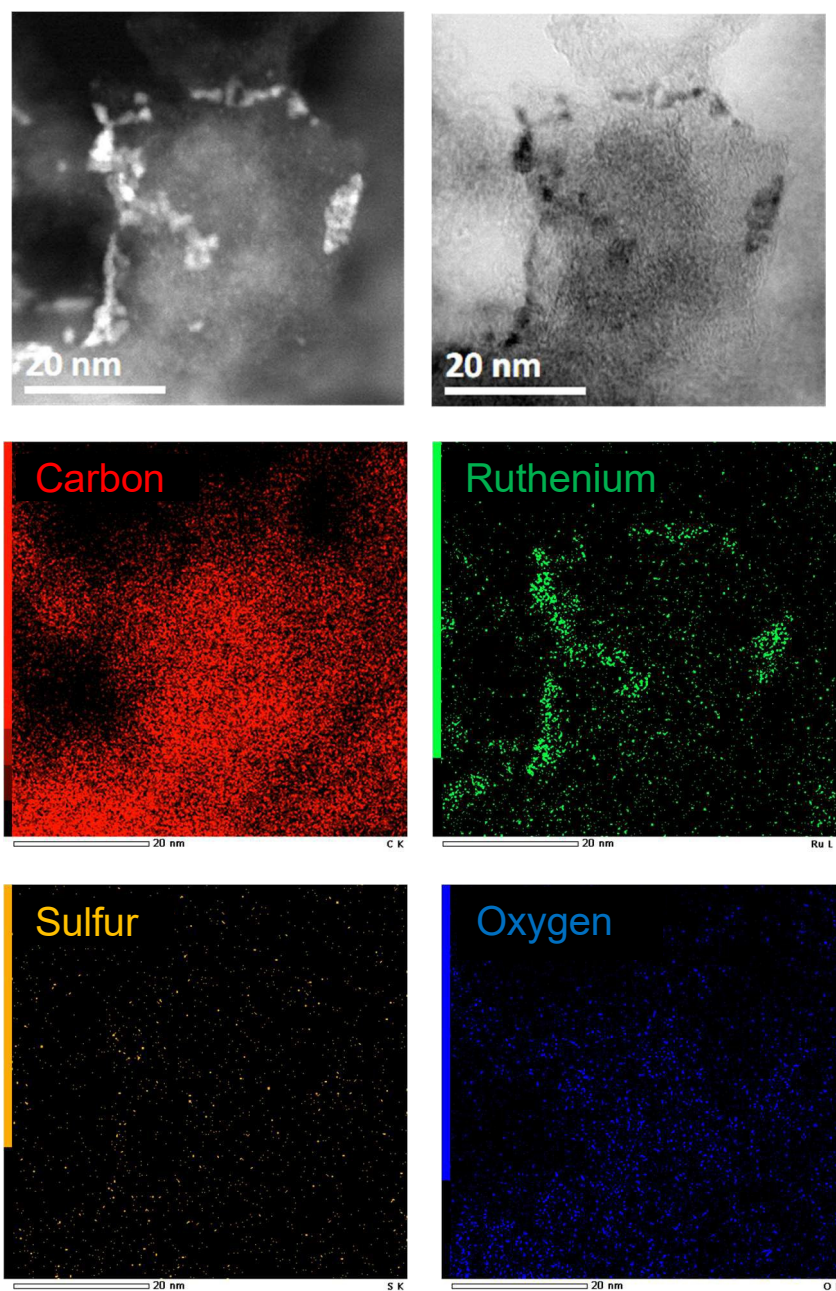

*Figure 13: HR-TEM, STEM and EDX mapping analyses for RuO<sub>2</sub> (5%) / AC before catalytic test*

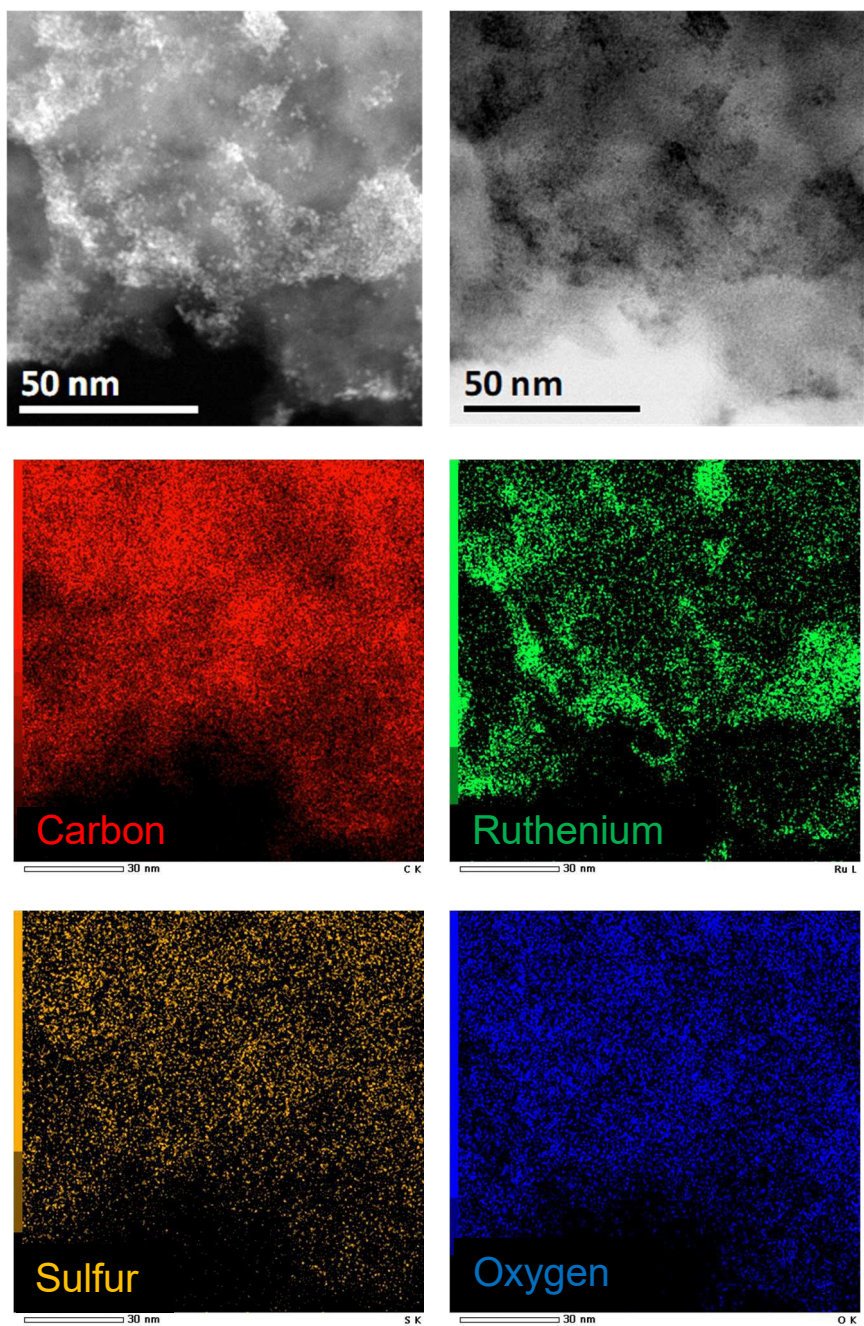

Figure 14: HR-TEM, STEM and EDX mapping analyses for RuO<sub>2</sub> (5%) – pre-treated SO<sub>3</sub>H / AC before catalytic test



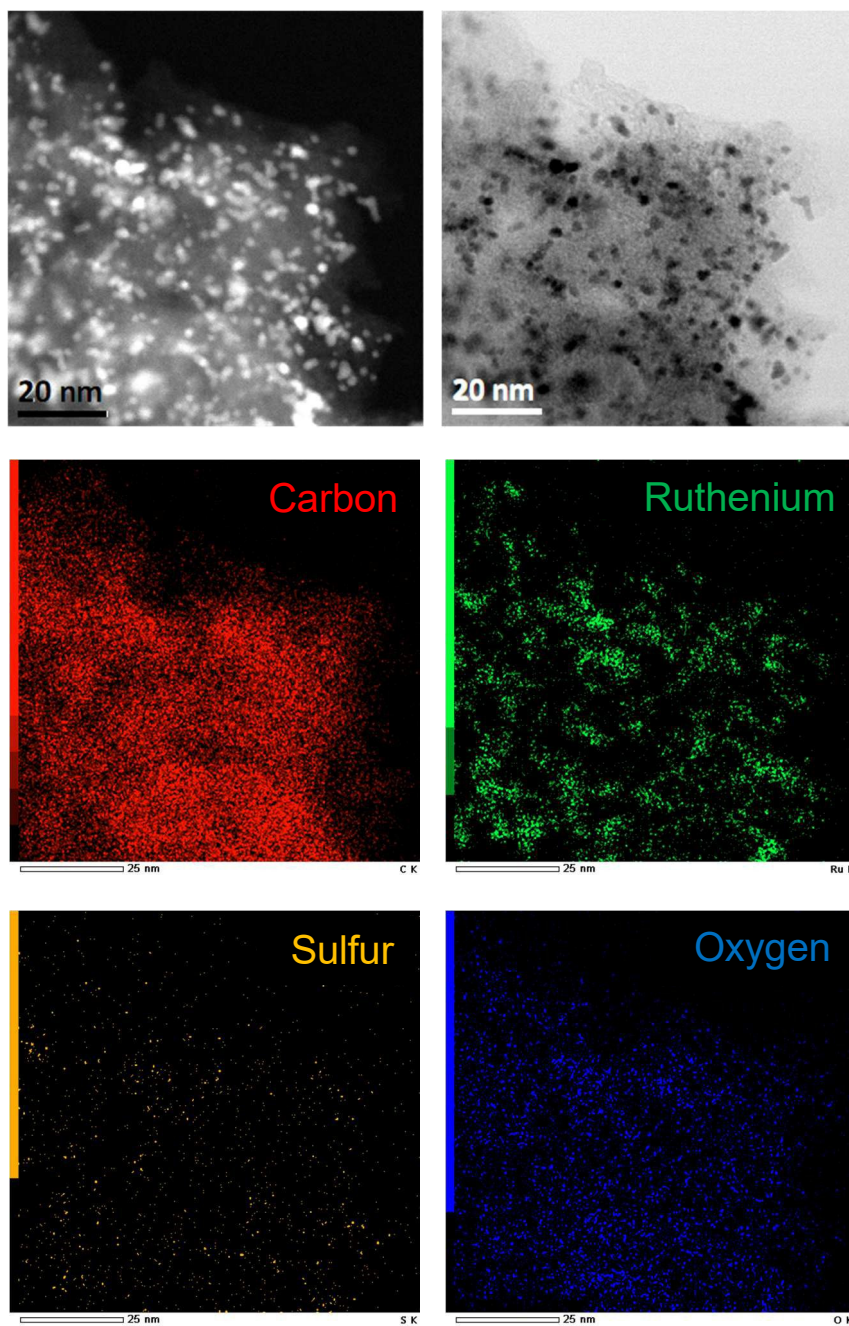

Figure 15: HR-TEM, STEM and EDX mapping analyses for RuO<sub>2</sub> (5%) / AC after 5 runs

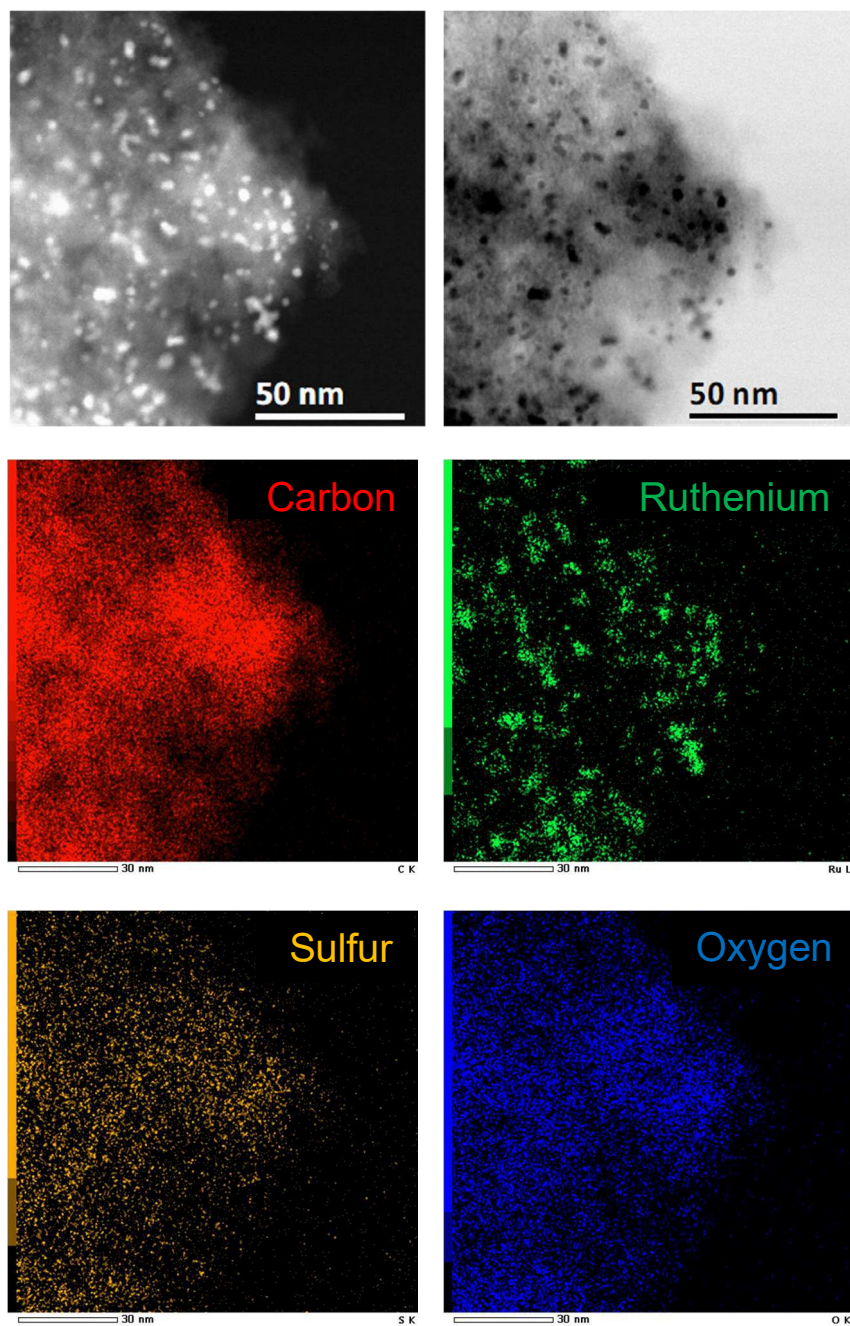

Figure 16: HR-TEM, STEM and EDX mapping analyses for RuO<sub>2</sub> (5%) – pre-treated SO<sub>3</sub>H / AC after 5 runs

*S9. Comparison of Ru regions from XPS analyses before and after several catalytic runs*

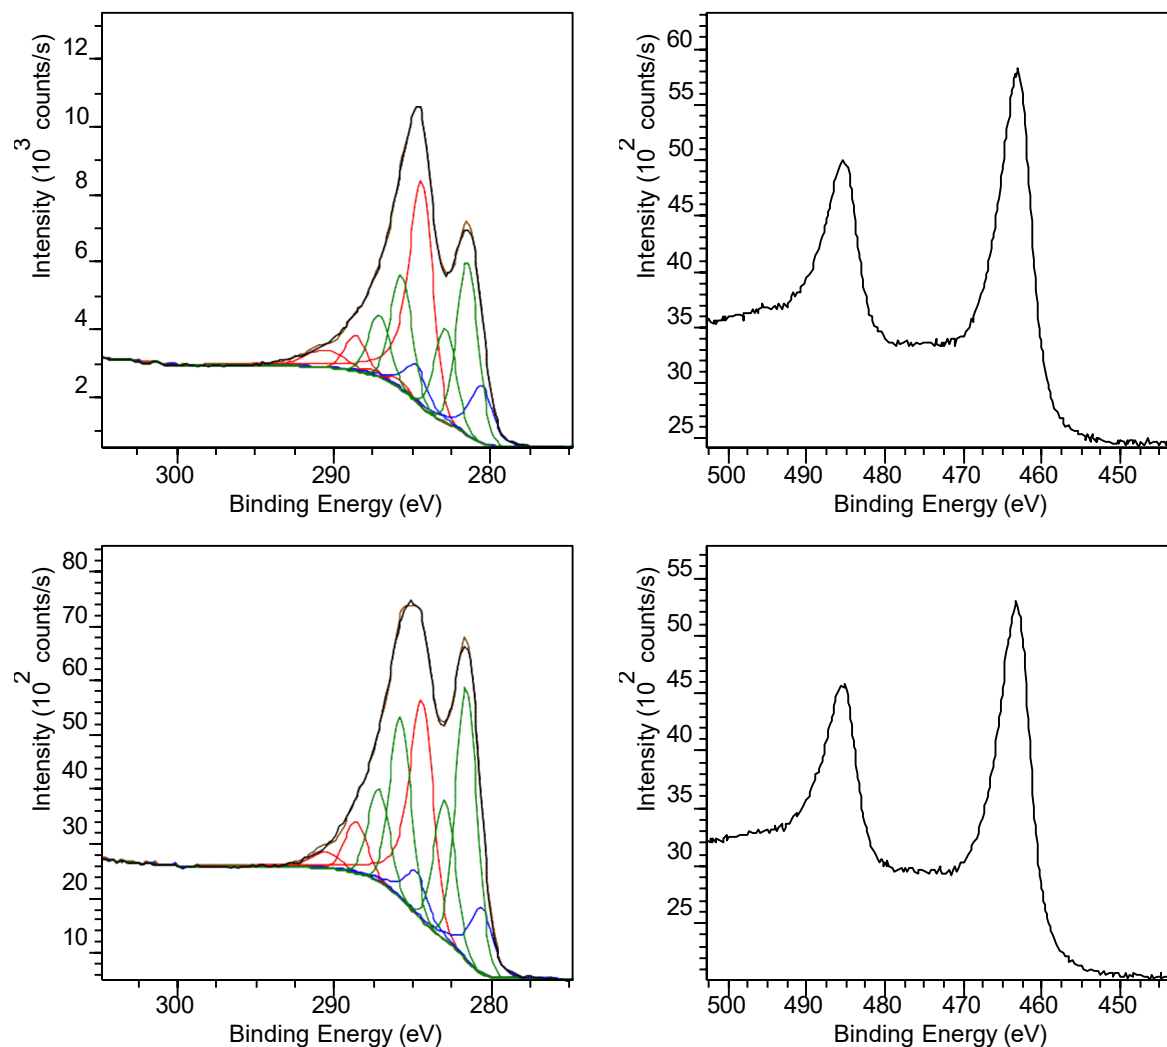

Figure 17: XPS ruthenium regions for: (TOP) RuO<sub>2</sub> (5%) / AC; (BOTTOM) RuO<sub>2</sub> (5%) – pre-treated SO<sub>3</sub>H / AC.

Left: Ru 3d doublet + C 1s, blue=Ru[0], green=Ru[IV] (main and satellite peaks), red= carbon species (major asymmetric C-(C,H) contribution with oxidized species and aromatic shake-up satellite). Right: Ru 3p doublet



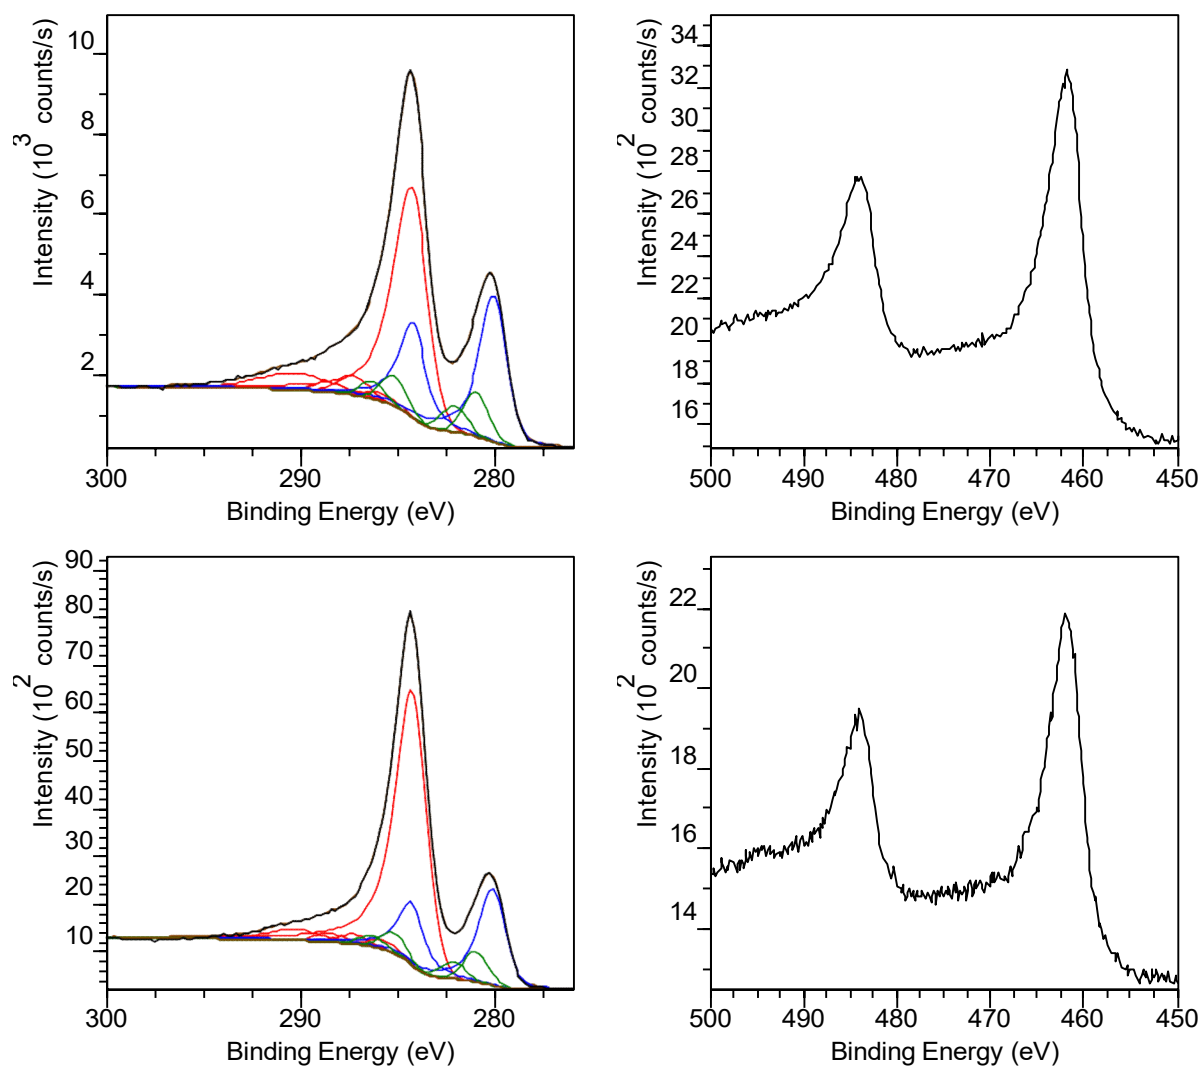

Figure 18: XPS ruthenium regions for: (TOP) RuO<sub>2</sub> (5%) / AC after 4 runs; (BOTTOM) RuO<sub>2</sub> (5%) – pre-treated SO<sub>3</sub>H / AC after 5 runs.

Left: Ru 3d doublet + C 1s, blue=Ru[0], green=Ru[IV] (main and satellite peaks), red= carbon species (major asymmetric C-(C,H) contribution with oxidized species and aromatic shake-up satellite). Right: Ru 3p doublet

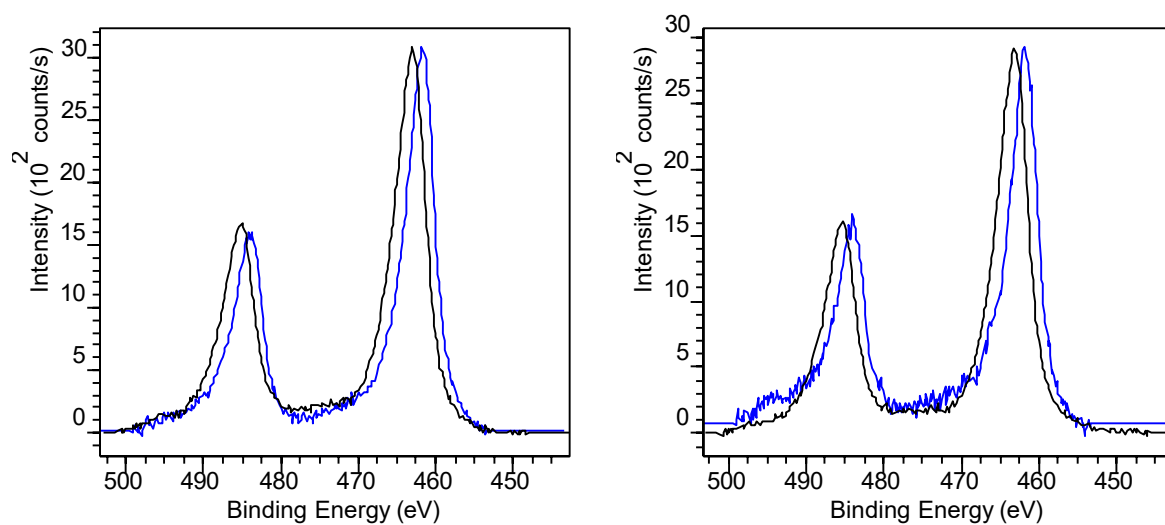

Figure 19: XPS Ru 3p regions for: (LEFT) RuO<sub>2</sub> (5%) / AC before (black) and after 4 runs (blue) ; (RIGHT) RuO<sub>2</sub> (5%) – pre-treated SO<sub>3</sub>H / AC before (black) and after 5 runs (blue).
